# Supplementary material
Source: PubMed Central journal article supplement (PMC2813422)

A F1473C

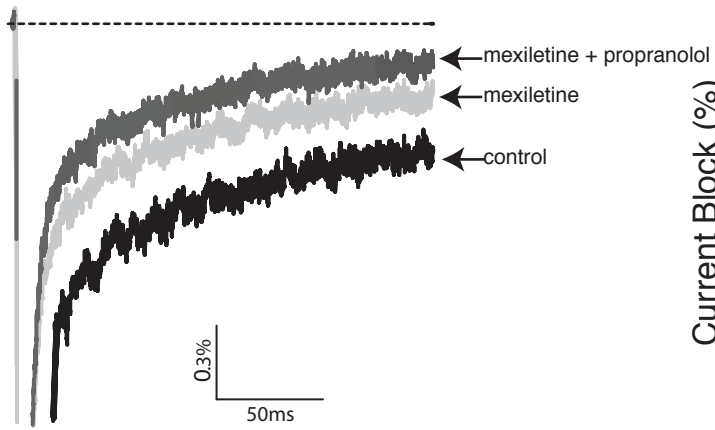

B

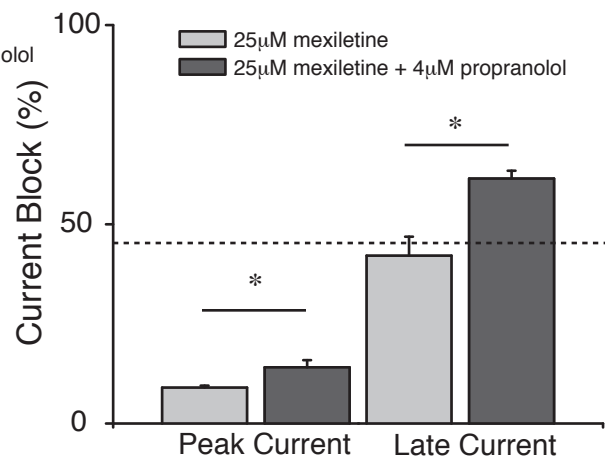

Supplement: NIHMS155164-supplement-Supplementary_data_and_figure.pdf [file NIHMS155164-supplement-Supplementary_data_and_figure.pdf]
